# Supplementary material for: FIRST-line support for Assistance in Breathing in Children (FIRST-ABC): a multicentre pilot randomised controlled trial of high-flow nasal cannula therapy versus continuous positive airway pressure in paediatric critical care
Source: PubMed Central journal article supplement (PMC5987627; doi:10.1186/s13054-018-2080-3), 2018-06-04
Supplement: 13054_2018_2080_MOESM4_ESM.pdf [file 13054_2018_2080_MOESM4_ESM.pdf]

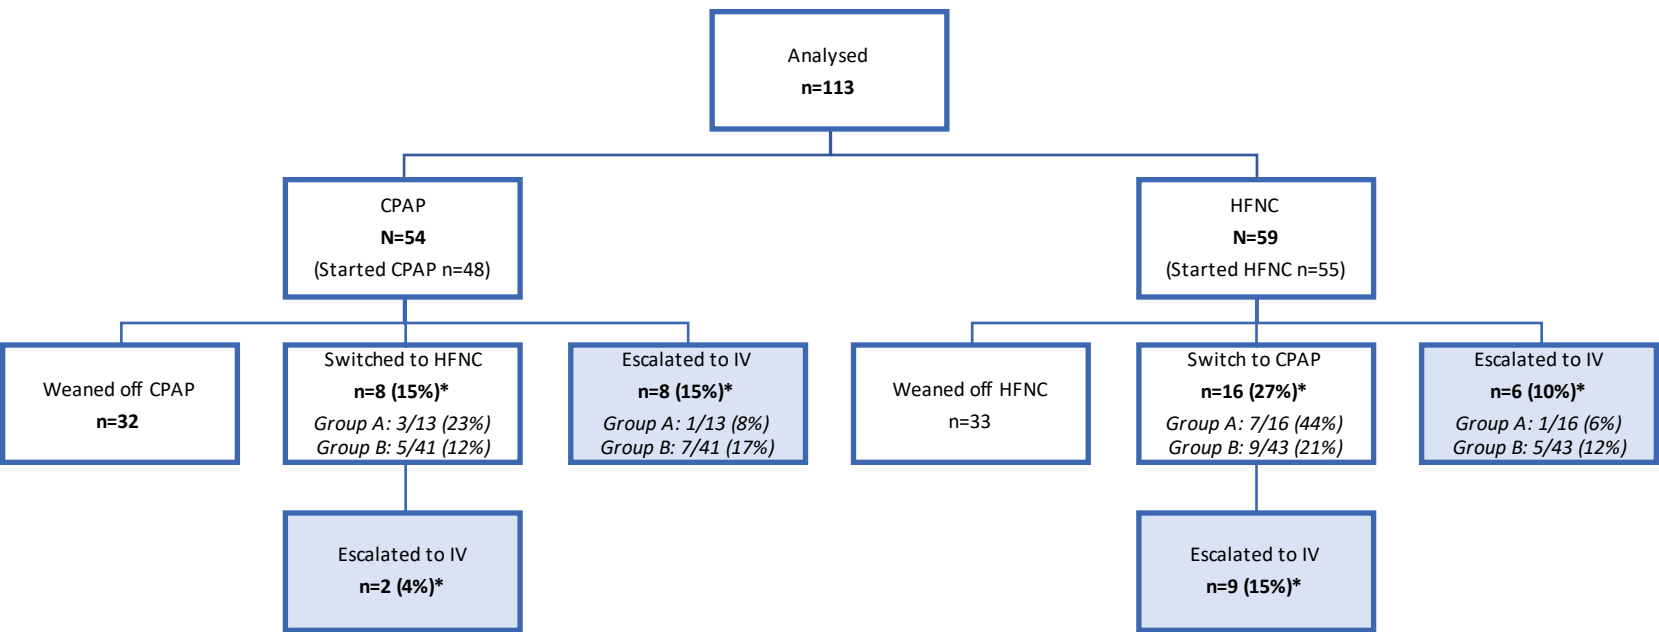

\* Percentage shown indicates proportion of children randomised to CPAP or HFNC (n/N)
